# Supplementary material
Source: PubMed Central journal article supplement (PMC7416662)
Supplement: 41587_2015_BFnbt3299_MOESM22_ESM.pdf [file 41587_2015_BFnbt3299_MOESM22_ESM.pdf]

## 2 - Supplementary Tables

**Supplementary Table 1. Methods descriptions**

| Subchallenge 1 |                                                                                                                                                                                                                                                                                             |
|----------------|---------------------------------------------------------------------------------------------------------------------------------------------------------------------------------------------------------------------------------------------------------------------------------------------|
| rank           | summary sentence                                                                                                                                                                                                                                                                            |
| 1              | Kmeans clustering to divide cell lines into sub groups for prediction using randomForest                                                                                                                                                                                                    |
| 2              | Kernel bilinear regression with an integrated cell lines kernel based on SNPs, RNA-Seq and covariates and a multi-task chemicals kernel based on empirical correlations.                                                                                                                    |
| 3              | Missing values were imputed, features were filtered based on their correlation to cytotoxicity data, random forests were trained for SNPs and RNAseq data, final predictions were the average of 2 individual models.                                                                       |
| 4              | Used compound name and covariates to build a combined regression model                                                                                                                                                                                                                      |
| 5              | Kmeans clustering to divide cell lines into sub groups for prediction using randomForest                                                                                                                                                                                                    |
| 6              | Averaged boosted trees / random forests on PLINK-preprocessed SNPs and EQTLs.                                                                                                                                                                                                               |
| 7              | Kmeans clustering to divide cell lines into sub groups for prediction using randomForest                                                                                                                                                                                                    |
| 8              | Systematic growth algorithm (SGA) is a novel polynomial time algorithm for learning nonlinear quantitative relationship from multiple input variables to single output.                                                                                                                     |
| 9              | Kmeans clustering to divide cell lines into sub groups for prediction using randomForest                                                                                                                                                                                                    |
| 10             | Use compound name and covariates to build a combined regression model                                                                                                                                                                                                                       |
| 11             | A Random Forest model was learnt for each drug using the genotype data and the normalized RNA-seq data.                                                                                                                                                                                     |
| 12             | Kmeans clustering to divide cell lines into sub groups for prediction using randomForest                                                                                                                                                                                                    |
| 13             | Kernel bilinear regression with a integrated cell lines kernel based on SNPs, RNA-Seq and covariates and a dirac chemicals kernel, with additional residuals boosting.                                                                                                                      |
| 14             | A multi-task learning approach using Random Forests, with SNP feature selection via fast GWAS, and bias correction for training/test set mismatch.                                                                                                                                          |
| 15             | A neural network trained on selected SNPs and dimension-reduced chemical features to do regression on EC10 values                                                                                                                                                                           |
| 16             | Systematic growth algorithm (SGA) is a novel polynomial time algorithm for learning nonlinear quantitative relationship from multiple input variables to single output.                                                                                                                     |
| 19             | Kernel bilinear regression with a linear cell lines kernel based on covariates and a slightly multitask chemicals kernel.                                                                                                                                                                   |
| 21             | Missing SNPs were imputed, features were filtered based on their correlation to the cytotoxicity data, the generalized boosted regression models were trained for SNPs and RNA-seq respectively, the final predictions were obtained based on the average score from two individual models. |
| 22             | A multi-task learning approach using Random Forests, with SNP feature selection via fast GWAS, and bias correction for training/test set mismatch.                                                                                                                                          |
| 23             | A multi-task learning approach using Random Forests, with SNP feature selection via fast GWAS, and bias correction for training/test set mismatch.                                                                                                                                          |
| 24             | A multi-task learning approach using Random Forests, with SNP feature selection via fast GWAS, and bias correction for training/test set mismatch.                                                                                                                                          |
| 26             | A multi-task learning approach using Random Forests, with SNP feature selection via fast GWAS, and bias correction for training/test set mismatch.                                                                                                                                          |
| 27             | Missing SNPs were imputed, features were filtered based on their correlations to the cytotoxicity data, the elastic net models were trained for SNPs and RNA-seq data respectively, the final predictions were obtained based on the average score from two individual models.              |

|    |                                                                                                                                                                                                                                                                                          |
|----|------------------------------------------------------------------------------------------------------------------------------------------------------------------------------------------------------------------------------------------------------------------------------------------|
| 28 | Use compound name and covariates to build lasso regression                                                                                                                                                                                                                               |
| 29 | Multitask Gaussian Process with Tanimoto kernels.                                                                                                                                                                                                                                        |
| 31 | The genomic data were combined with chemical descriptors to learn a single model simultaneously predicting the cytotoxicity of all drugs in all cell lines and the prediction were normalized.                                                                                           |
| 32 | Linear regression with supervised principal components is used to predict EC10 cytotoxicity with RNAseq and SNP data as predictors.                                                                                                                                                      |
| 33 | Phenotype specific AdaBoost ensemble of Regression Trees on covariates and SNPs selected by GWAS                                                                                                                                                                                         |
| 34 | One Random Forest model for each drug was learnt using only the genomic data as predictors.                                                                                                                                                                                              |
| 35 | We integrated a collection of machine-learning techniques and SNPs selection methods into a Bag-of-models-like approach where for each compound we selected the best performing method from the different combinations of machine-learning techniques and input features for prediction. |
| 37 | We integrated a collection of machine-learning techniques and SNPs selection methods into a Bag-of-models-like approach where for each compound we selected the best performing method from the different combinations of machine-learning techniques and input features for prediction. |
| 38 | Combination of Random Forest simultaneous prediction and drug by drug Random Forest model taking RNA-seq data into account.                                                                                                                                                              |
| 39 | The genomic data were combined with chemical descriptors to learn a single model simultaneously predicting the cytotoxicity of all drugs in all cell lines.                                                                                                                              |
| 40 | Predicting cellular toxicity with multiple layers of neural network.                                                                                                                                                                                                                     |
| 41 | Linear fitting of existing data.                                                                                                                                                                                                                                                         |
| 42 | The toxicity of an unknown cell was predicted by a weighted average of toxicity values of closely related cells, as defined by Pearson correlation coefficients of surrogate biomarkers for each toxin.                                                                                  |
| 46 | Kernel bilinear regression with a linear cell lines kernel based on covariates and a dirac chemicals kernel, with additional residuals boosting.                                                                                                                                         |
| 47 | Linear fitting and using SNPs to get lower boundary of EC data.                                                                                                                                                                                                                          |
| 48 | Regularized least-squares regression with 10-fold cross-validation and elastic net on a selected set of genotypes, calculated with the Kruskal-Wallis test.                                                                                                                              |
| 49 | A machine learning approach that uses Feature Selection coupled with a regression method to resolve the problem of Toxicogenetic Dream Sub-Challenges.                                                                                                                                   |
| 50 | The toxicity of an unknown cell was predicted by a weighted average of toxicity values of closely related cells, as defined by Pearson correlation coefficients of surrogate biomarkers for each toxin.                                                                                  |
| 51 | A machine learning approach that uses Feature Selection coupled with a regression method to resolve the problem of Toxicogenetic Dream Sub-Challenges.                                                                                                                                   |
| 52 | Random forest predictions based on covariates, and Gram matrices for SNPs, RNA-Seq.                                                                                                                                                                                                      |
| 53 | We have build continent specific models for each chemical cytotoxicity using random forest algorithm.                                                                                                                                                                                    |
| 55 | AdaBoost Ensemble of Regression Trees on selected SNPs and covariates                                                                                                                                                                                                                    |
| 56 | Gaussian process regression on a per-compound basis, tuning the set of SNPs used for each compound.                                                                                                                                                                                      |
| 57 | Linear regression with elastic net regression is used to predict EC10 cytotoxicity with RNAseq and SNP data as predictors.                                                                                                                                                               |
| 58 | An approach based on two dimensionality reduction techniques Locality-Sensitive Hashing (LSH) and Singular Value Decomposition (SVD) in connection to discriminative learning methods.                                                                                                   |
| 59 | A machine learning approach that uses Feature Selection coupled with a regression method to resolve the problem of Toxicogenetic Dream Sub-Challenges.                                                                                                                                   |
| 61 | Use compound name, covariates, RNA, and SNP to build a Lasso regression model                                                                                                                                                                                                            |

|    |                                                                                                                                                                                                                                                                      |
|----|----------------------------------------------------------------------------------------------------------------------------------------------------------------------------------------------------------------------------------------------------------------------|
| 62 | The toxicity of an unknown cell was predicted by a weighted average of toxicity values of closely related cells, as defined by Pearson correlation coefficients of surrogate biomarkers for each toxin.                                                              |
| 63 | Kernel based matrix factorization                                                                                                                                                                                                                                    |
| 66 | A machine learning approach that uses Feature Selection coupled with a regression method to resolve the problem of Toxicogenetic Dream Sub-Challenges.                                                                                                               |
| 68 | Linear regression with elastic net regression is used to predict EC10 cytotoxicity with RNAseq and SNP data as predictors.                                                                                                                                           |
| 69 | Linear regression with elastic net regression is used to predict EC10 cytotoxicity with RNAseq and SNP data as predictors.                                                                                                                                           |
| 71 | An approach based on two dimensionality reduction techniques Locality-Sensitive Hashing (LSH) and Singular Value Decomposition (SVD) in connection to discriminative learning methods.                                                                               |
| 72 | Linear regression with elastic net regression is used to predict EC10 cytotoxicity with RNAseq and SNP data as predictors.                                                                                                                                           |
| 75 | Gaussian process regression on a per-compound basis, tuning the set of SNPs used for each compound, and flipping the predictions of lowest quality.                                                                                                                  |
| 76 | Single task univariate linear regression over the first principal component computed on a reduced set of SNPs.                                                                                                                                                       |
| 77 | Bayesian Multiple Kernel Learning with additional input data                                                                                                                                                                                                         |
| 80 | The toxicity of an unknown cell was predicted by a weighted average of toxicity values of closely related cells, as defined by Pearson correlation coefficients of surrogate biomarkers for each toxin.                                                              |
| 82 | The toxicity of an unknown cell was predicted by a weighted average of toxicity values of closely related cells, as defined by Pearson correlation coefficients of surrogate biomarkers for each toxin.                                                              |
| 85 | We estimate the probabilities of signal transduction for all the stimulus-response circuits of each signalling pathway from gene expression values, which are further used in a SVM $\hat{a}$ -regression with k-fold cross-validation to obtain a prediction model. |
| 86 | Bayesian Multiple Kernel Learning                                                                                                                                                                                                                                    |
| 87 | Predicting cellular toxicity with multiple layers of neural network.                                                                                                                                                                                                 |
| 89 | Kernel based matrix factorization                                                                                                                                                                                                                                    |
| 90 | Kernel based matrix factorization                                                                                                                                                                                                                                    |
| 91 | Gaussian process regression on a per-compound basis.                                                                                                                                                                                                                 |
| 92 | this is only a random number generator.                                                                                                                                                                                                                              |
| 93 | Use compound name, covariates, RNA, and SNP to build an elastic-net regression model                                                                                                                                                                                 |
| 94 | A neural network trained on selected SNPs and dimension-reduced chemical features to do regression on EC10 values                                                                                                                                                    |
| 95 | Random forest regression using important SNP selection obtained by the Bourta method.                                                                                                                                                                                |
| 97 | A neural network trained on selected SNPs and dimension-reduced chemical features to do regression on EC10 values                                                                                                                                                    |
| 98 | A neural network trained on selected SNPs and dimension-reduced chemical features to do regression on EC10 values                                                                                                                                                    |
| 99 | A neural network trained on selected SNPs and dimension-reduced chemical features to do regression on EC10 values                                                                                                                                                    |

## Subchallenge 2

| rank | summary sentence                                                                                      |
|------|-------------------------------------------------------------------------------------------------------|
| 1    | Our method used feature selection and group based models to predict cytotoxicities for new compounds. |

|    |                                                                                                                                                                                                                                                                                                                                                           |
|----|-----------------------------------------------------------------------------------------------------------------------------------------------------------------------------------------------------------------------------------------------------------------------------------------------------------------------------------------------------------|
| 2  | Our method used group-based models for prediction.                                                                                                                                                                                                                                                                                                        |
| 3  | We used group based models.                                                                                                                                                                                                                                                                                                                               |
| 4  | We used group based models.                                                                                                                                                                                                                                                                                                                               |
| 5  | We used group based models.                                                                                                                                                                                                                                                                                                                               |
| 6  | ElasticNet prediction of median and inter-quantile distance of log(EC10) as two independent problems                                                                                                                                                                                                                                                      |
| 8  | Random forest model with some simple variable selection beforehand                                                                                                                                                                                                                                                                                        |
| 9  | Molecules are characterized by biotechnological measurements (pharmacological analoging) rather than by their chemical structure (structural analoging).                                                                                                                                                                                                  |
| 10 | Two kinds of feature: CDK and SiRMS were combined, generalized boosted regression model is constructed to do the prediction task.                                                                                                                                                                                                                         |
| 11 | Molecules are characterized by biotechnological measurements (pharmacological analoging) rather than by their chemical structure (structural analoging).                                                                                                                                                                                                  |
| 12 | A hybrid approach using a selection method based on Random Forests to determine variable importance coupled with Support Vector Machines to model cytotoxicity to chemical compounds based on structural descriptors.                                                                                                                                     |
| 13 | Molecules are characterized by biotechnological measurements (pharmacological analoging) rather than by their chemical structure (structural analoging).                                                                                                                                                                                                  |
| 14 | A hybrid approach using a selection method based on Random Forests to determine variable importance coupled with Support Vector Machines to model populations median cytotoxicity to chemical compounds based on structural descriptors. Multivariate adaptive regression splines was applied to predict populations 5th and 95th cytotoxicity quartiles. |
| 15 | The set of chemical descriptors were expanded by using external sources and including metabolite information for the subsequent prediction of drug sensitivity with Random Forest.                                                                                                                                                                        |
| 16 | Gradient Boosting Machine after simple variable selection step                                                                                                                                                                                                                                                                                            |
| 17 | Support vector regression prediction of median and inter-quantile distance of log(EC10) as two independent problems.                                                                                                                                                                                                                                      |
| 18 | Greedy ensemble of several standard machine learning methods                                                                                                                                                                                                                                                                                              |
| 19 | Molecules are characterized by biotechnological measurements (pharmacological analoging) rather than by their chemical structure (structural analoging).                                                                                                                                                                                                  |
| 21 | Two kinds of features were combined, the random forest model was trained to do the prediction task.                                                                                                                                                                                                                                                       |
| 22 | Molecules are characterized by biotechnological measurements (pharmacological analoging) rather than by their chemical structure (structural analoging).                                                                                                                                                                                                  |
| 24 | The set of chemical descriptors were expanded by using external sources and including metabolite information for the subsequent prediction of drug sensitivity with Random Forest.                                                                                                                                                                        |
| 25 | Ensemble prediction of median and inter-quantile distance of log(EC10) as two independent problems                                                                                                                                                                                                                                                        |
| 26 | A neural network trained on selected SNPs and dimension-reduced chemical features to do regression on EC10 values.                                                                                                                                                                                                                                        |
| 28 | A neural network trained on selected SNPs and dimension-reduced chemical features to do regression on EC10 values.                                                                                                                                                                                                                                        |
| 29 | A neural network trained on selected SNPs and dimension-reduced chemical features to do regression on EC10 values.                                                                                                                                                                                                                                        |
| 30 | A neural network trained on selected SNPs and dimension-reduced chemical features to do regression on EC10 values.                                                                                                                                                                                                                                        |
| 31 | Two kinds of features were combined, the principal component analysis technique was used to do dimension reduction, the linear regression model was trained to do the prediction task.                                                                                                                                                                    |
| 33 | Kernel based matrix factorization                                                                                                                                                                                                                                                                                                                         |
| 36 | Two kinds of features were combined, the elastic net model was trained to do the prediction task.                                                                                                                                                                                                                                                         |

|    |                                                                                                                                                                                                                                                                                                                                                           |
|----|-----------------------------------------------------------------------------------------------------------------------------------------------------------------------------------------------------------------------------------------------------------------------------------------------------------------------------------------------------------|
| 37 | A hybrid approach using a selection method based on Random Forests to determine variable importance coupled with Support Vector Machines to model cytotoxicity to chemical compounds based on structural descriptors.                                                                                                                                     |
| 38 | We have used random forest (ensemble decision tree) algorithm to predict the cytotoxicity of chemicals using their chemical attributes.                                                                                                                                                                                                                   |
| 40 | Partial least squares (PLS) is a projection method where the independent variables, represented as the matrix X, are projected onto a low dimensional space. PLS uses both X and Y.                                                                                                                                                                       |
| 41 | MARS (Multivariate Adaptive Regression Splines) model after simple preprocessing                                                                                                                                                                                                                                                                          |
| 42 | A hybrid approach using a selection method based on Random Forests to determine variable importance coupled with Support Vector Machines to model populations median cytotoxicity to chemical compounds based on structural descriptors. Multivariate adaptive regression splines was applied to predict populations 5th and 95th cytotoxicity quartiles. |
| 43 | The set of chemical descriptors were expanded by using external sources and including metabolite information for the subsequent prediction of drug sensitivity with Random Forest.                                                                                                                                                                        |
| 46 | Partial least squares (PLS) is a projection method where the independent variables, represented as the matrix X, are projected onto a low dimensional space. PLS uses both X and Y.                                                                                                                                                                       |
| 47 | Kernel based matrix factorization                                                                                                                                                                                                                                                                                                                         |
| 48 | Partial least squares (PLS) is a projection method where the independent variables, represented as the matrix X, are projected onto a low dimensional space. PLS uses both X and Y.                                                                                                                                                                       |
| 49 | Bayesian Multiple Kernel Learning with additional input data                                                                                                                                                                                                                                                                                              |
| 50 | A machine learning approach that uses Feature Selection coupled with a regression method to resolve the problem of Toxicogenetic Dream Sub-Challenges.                                                                                                                                                                                                    |
| 51 | A hybrid approach using a selection method based on Random Forests to determine variable importance coupled with Support Vector Machines to model populations median cytotoxicity to chemical compounds based on structural descriptors. Multivariate adaptive regression splines was applied to predict populations 5th and 95th cytotoxicity quartiles. |
| 52 | Multi-task GP regression prediction of median and inter-quantile distance of log(EC10) as two independent problems.                                                                                                                                                                                                                                       |
| 54 | An ensemble of 10 different machine learning models averaged together.                                                                                                                                                                                                                                                                                    |
| 55 | Partial least squares (PLS) is a projection method where the independent variables, represented as the matrix X, are projected onto a low dimensional space. PLS uses both X and Y.                                                                                                                                                                       |
| 58 | Random Forest regression modelling EC10 from both important SNPs and chemical descriptors trained on a data from Subchallenge 1.                                                                                                                                                                                                                          |
| 62 | Kernel based matrix factorization                                                                                                                                                                                                                                                                                                                         |
| 66 | Kernel based matrix factorization                                                                                                                                                                                                                                                                                                                         |
| 67 | A neural network trained on selected SNPs and dimension-reduced chemical features to do regression on EC10 values.                                                                                                                                                                                                                                        |
| 74 | k-nearest-neighbor prediction of median and inter-quantile distance of log(EC10) as two independent problems.                                                                                                                                                                                                                                             |
| 79 | Partial least squares (PLS) is a projection method where the independent variables, represented as the matrix X, are projected onto a low dimensional space. PLS uses both X and Y.                                                                                                                                                                       |
| 80 | Random Forest regression in R statistical environment was used to predict median values and interquartile ranges for EC10 in the 50 test compounds (for which no EC10 values were provided), based on a training dataset of 106 compounds.                                                                                                                |

[tables/SuppTable1aMethodsDescriptionsch1.pdf](#)  
[tables/SuppTable1aMethodsDescriptionsch1.pdf](#)

**Supplementary Table 2. 41 KEGG pathways, manually selected for dimension reduction**

|                                             |                                     |
|---------------------------------------------|-------------------------------------|
| KEGG_ACUTE_MYELOID_LEUKEMIA                 | KEGG_NUCLEOTIDE_EXCISION_REPAIR     |
| KEGG_APOPTOSIS                              | KEGG_P53_SIGNALING_PATHWAY          |
| KEGG_BASAL_CELL_CARCINOMA                   | KEGG_PANCREATIC_CANCER              |
| KEGG_BASAL_TRANSCRIPTION_FACTORS            | KEGG_PATHWAYS_IN_CANCER             |
| KEGG_BASE_EXCISION_REPAIR                   | KEGG_PEROXISOME                     |
| KEGG_BLADDER_CANCER                         | KEGG_PPAR_SIGNALING_PATHWAY         |
| KEGG_CELL_CYCLE                             | KEGG_PROSTATE_CANCER                |
| KEGG_CHRONIC_MYELOID_LEUKEMIA               | KEGG_PROTEASOME                     |
| KEGG_CYTOKINE_CYTOKINE_RECEPTOR_INTERACTION | KEGG_REGULATION_OF_AUTOPHAGY        |
| KEGG_DNA_REPLICATION                        | KEGG_RENAL_CELL_CARCINOMA           |
| KEGG_ENDOMETRIAL_CANCER                     | KEGG_RNA_DEGRADATION                |
| KEGG_ERBB_SIGNALING_PATHWAY                 | KEGG_RNA_POLYMERASE                 |
| KEGG_GLIOMA                                 | KEGG_SMALL_CELL_LUNG_CANCER         |
| KEGG_HOMOLOGOUS_RECOMBINATION               | KEGG_SPLICEOSOME                    |
| KEGG_JAK_STAT_SIGNALING_PATHWAY             | KEGG_TGF_BETA_SIGNALING_PATHWAY     |
| KEGG_LYSOSOME                               | KEGG_THYROID_CANCER                 |
| KEGG_MAPK_SIGNALING_PATHWAY                 | KEGG_UBIQUITIN_MEDIATED_PROTEOLYSIS |
| KEGG_MELANOMA                               | KEGG_VEGF_SIGNALING_PATHWAY         |
| KEGG_MISMATCH_REPAIR                        | KEGG_WNT_SIGNALING_PATHWAY          |
| KEGG_MTOR_SIGNALING_PATHWAY                 | KEGG_NON_HOMOLOGOUS_END_JOINING     |
| KEGG_NON_SMALL_CELL_LUNG_CANCER             |                                     |

[tables/SuppTable2\\_KEGGpathways.pdf](#)

**Supplementary Table 3. Chemical descriptors characterizing predictability**

| CDK descriptors  | p     |
|------------------|-------|
| LipinskiFailures | 0.016 |
| BCUTp.1l         | 0.036 |

| Dragon descriptors | p     |
|--------------------|-------|
| MAXDP              | 0.038 |
| MATS6m             | 0.028 |
| MATS6v             | 0.030 |
| MATS6p             | 0.040 |
| GATS5m             | 0.026 |
| GATS5v             | 0.009 |
| GATS2e             | 0.025 |
| GATS3p             | 0.029 |
| GATS5p             | 0.041 |
| JGI5               | 0.037 |
| ALOGP              | 0.040 |
| B02[C-O]           | 0.025 |
| B04[C-C]           | 0.041 |

| SIRMS descriptors                      | p     |
|----------------------------------------|-------|
| S_A.elm..C_H_H_O.1_2s.1_3s.1_4s.5      | 0.048 |
| S_A.type..C.3_H_H_O.3.1_2s.1_3s.1_4s.5 | 0.048 |
| Fr2.chg..C_D.1_2a.                     | 0.041 |
| Fr3.chg..A_C_D.1_3s.2_3a.              | 0.041 |
| Fr3.chg..B_C_D.1_2a.2_3a.              | 0.041 |
| S_A.chg..A_B_C_D.1_4s.2_3a.3_4a.6      | 0.041 |
| S_A.chg..A_B_C_D.1_4s.3_4a.4           | 0.048 |
| S_A.chg..B_C_C_D.1_2s.1_3a.3_4a.6      | 0.041 |
| S_A.chg..B_C_D_D.1_2a.2_4a.4           | 0.049 |
| Fr2.d_a..A_l.1_2s.                     | 0.047 |

[tables/SuppTable3\\_ChemicalDescriptorsForPredictability.pdf](#)

**Supplementary Table 4. Leaderboard subchallenge 1**

| team               | rank PCI | mean PCI | max PCI | mean ranking PCI | z-score mean ranking PCI | FDR mean ranking PCI | rank PC | mean PC | max PC | mean ranking PC | z-score mean ranking PC | FDR mean ranking PC | mean ranking | rank |
|--------------------|----------|----------|---------|------------------|--------------------------|----------------------|---------|---------|--------|-----------------|-------------------------|---------------------|--------------|------|
| Yang_Lab           | 1        | 0.514    | 0.553   | 27.22            | -7.60                    | 0.00                 | 2       | 0.053   | 0.233  | 31.87           | -6.05                   | 0.00                | 1.5          | 1    |
| CASSIS             | 2        | 0.512    | 0.557   | 31.57            | -6.15                    | 0.00                 | 4       | 0.048   | 0.215  | 34.35           | -5.22                   | 0.00                | 3            | 2    |
| amss2012           | 3        | 0.511    | 0.552   | 34.81            | -5.07                    | 0.00                 | 5       | 0.045   | 0.205  | 36.67           | -4.45                   | 0.00                | 4            | 3    |
| UT_CCB             | 11       | 0.510    | 0.563   | 38.82            | -3.73                    | 0.00                 | 1       | 0.068   | 0.279  | 28.15           | -7.29                   | 0.00                | 6            | 4    |
| Yang_Lab           | 4        | 0.510    | 0.554   | 36.05            | -4.65                    | 0.00                 | 10      | 0.043   | 0.231  | 38.01           | -4.00                   | 0.00                | 7            | 5.5  |
| O6d0A              | 6        | 0.510    | 0.545   | 36.35            | -4.55                    | 0.00                 | 8       | 0.043   | 0.186  | 37.89           | -4.04                   | 0.00                | 7            | 5.5  |
| Yang_Lab           | 8        | 0.510    | 0.553   | 37.93            | -4.03                    | 0.00                 | 7       | 0.041   | 0.207  | 37.77           | -4.08                   | 0.00                | 7.5          | 7    |
| CQB                | 7        | 0.510    | 0.552   | 37.21            | -4.27                    | 0.00                 | 9       | 0.046   | 0.220  | 37.93           | -4.03                   | 0.00                | 8            | 8    |
| Yang_Lab           | 5        | 0.510    | 0.552   | 36.27            | -4.58                    | 0.00                 | 13      | 0.039   | 0.204  | 40.07           | -3.31                   | 0.00                | 9            | 9.5  |
| UT_CCB             | 15       | 0.508    | 0.543   | 41.07            | -2.98                    | 0.01                 | 3       | 0.050   | 0.194  | 32.81           | -5.73                   | 0.00                | 9            | 9.5  |
| D-Tox              | 13       | 0.510    | 0.545   | 39.05            | -3.65                    | 0.00                 | 6       | 0.044   | 0.279  | 37.35           | -4.22                   | 0.00                | 9.5          | 11   |
| Yang_Lab           | 10       | 0.509    | 0.557   | 38.81            | -3.73                    | 0.00                 | 11      | 0.041   | 0.221  | 38.19           | -3.94                   | 0.00                | 10.5         | 12   |
| CASSIS             | 9        | 0.510    | 0.552   | 38.29            | -3.91                    | 0.00                 | 15      | 0.038   | 0.212  | 40.20           | -3.27                   | 0.00                | 12           | 13   |
| WarwickDataScience | 12       | 0.509    | 0.545   | 38.90            | -3.70                    | 0.00                 | 14      | 0.035   | 0.187  | 40.15           | -3.29                   | 0.00                | 13           | 14   |
| Kaiju              | 14       | 0.508    | 0.541   | 40.31            | -3.23                    | 0.00                 | 16      | 0.032   | 0.201  | 41.44           | -2.86                   | 0.01                | 15           | 15.5 |
| CQB                | 18       | 0.508    | 0.541   | 43.14            | -2.29                    | 0.06                 | 12      | 0.041   | 0.170  | 38.33           | -3.89                   | 0.00                | 15           | 15.5 |
| UTSW_QBRC          | 16       | 0.508    | 0.551   | 42.24            | -2.59                    | 0.03                 | 17      | 0.031   | 0.215  | 42.47           | -2.51                   | 0.03                | 16.5         | 17   |
| QBRC_UTSW_km48     | 17       | 0.507    | 0.549   | 42.51            | -2.50                    | 0.04                 | 20      | 0.027   | 0.212  | 44.37           | -1.88                   | 0.15                | 18.5         | 18   |
| CASSIS             | 22       | 0.507    | 0.552   | 44.33            | -1.89                    | 0.13                 | 18      | 0.032   | 0.226  | 43.74           | -2.09                   | 0.10                | 20           | 19   |
| UTSW_QBRC_km36     | 19       | 0.507    | 0.549   | 43.35            | -2.22                    | 0.07                 | 24      | 0.026   | 0.212  | 45.00           | -1.67                   | 0.20                | 21.5         | 20   |
| amss2012           | 25       | 0.507    | 0.550   | 45.11            | -1.63                    | 0.20                 | 19      | 0.031   | 0.185  | 44.13           | -1.96                   | 0.13                | 22           | 21   |
| WarwickDataScience | 21       | 0.507    | 0.540   | 43.92            | -2.03                    | 0.10                 | 25      | 0.028   | 0.180  | 45.10           | -1.64                   | 0.20                | 23           | 23   |
| WarwickDataScience | 23       | 0.507    | 0.542   | 44.54            | -1.82                    | 0.15                 | 23      | 0.028   | 0.185  | 44.96           | -1.68                   | 0.20                | 23           | 23   |
| WarwickDataScience | 24       | 0.507    | 0.544   | 44.70            | -1.77                    | 0.16                 | 22      | 0.027   | 0.171  | 44.76           | -1.75                   | 0.18                | 23           | 23   |
| NEXUS              | 29       | 0.506    | 0.544   | 45.55            | -1.48                    | 0.23                 | 21      | 0.028   | 0.195  | 44.42           | -1.86                   | 0.15                | 25           | 25   |
| WarwickDataScience | 20       | 0.507    | 0.542   | 43.71            | -2.10                    | 0.09                 | 32      | 0.026   | 0.185  | 46.19           | -1.27                   | 0.31                | 26           | 26   |
| amss2012           | 26       | 0.506    | 0.539   | 45.25            | -1.58                    | 0.21                 | 27      | 0.027   | 0.187  | 45.37           | -1.54                   | 0.22                | 26.5         | 27   |
| UT_CCB             | 28       | 0.506    | 0.542   | 45.48            | -1.51                    | 0.23                 | 26      | 0.026   | 0.171  | 45.11           | -1.63                   | 0.20                | 27           | 28   |
| mlcb               | 27       | 0.506    | 0.539   | 45.27            | -1.58                    | 0.21                 | 31      | 0.024   | 0.175  | 46.02           | -1.33                   | 0.29                | 29           | 29   |
| YODAsttest         | 30.5     | 0.506    | 0.545   | 45.65            | -1.45                    | 0.23                 | 28      | 0.026   | 0.198  | 45.51           | -1.50                   | 0.23                | 29.25        | 30   |
| D-Tox              | 32       | 0.507    | 0.545   | 45.73            | -1.43                    | 0.24                 | 35      | 0.027   | 0.220  | 46.57           | -1.14                   | 0.35                | 33.5         | 31   |
| CytotoxicAvengers  | 37       | 0.506    | 0.536   | 46.67            | -1.11                    | 0.36                 | 33      | 0.024   | 0.159  | 46.26           | -1.25                   | 0.32                | 35           | 32.5 |
| TeamRoslin         | 40       | 0.505    | 0.535   | 47.99            | -0.67                    | 0.62                 | 30      | 0.027   | 0.185  | 45.64           | -1.45                   | 0.24                | 35           | 32.5 |
| D-Tox              | 30.5     | 0.507    | 0.545   | 45.65            | -1.45                    | 0.23                 | 40      | 0.027   | 0.224  | 47.22           | -0.93                   | 0.44                | 35.25        | 34   |
| MPIMG              | 43       | 0.505    | 0.551   | 48.38            | -0.54                    | 0.66                 | 29      | 0.026   | 0.215  | 45.52           | -1.50                   | 0.23                | 36           | 35   |
| UTSW_QBRC          | 35       | 0.506    | 0.553   | 46.62            | -1.13                    | 0.36                 | 38      | 0.022   | 0.215  | 46.66           | -1.11                   | 0.35                | 36.5         | 36   |
| MPIMG              | 38       | 0.505    | 0.552   | 47.37            | -0.88                    | 0.49                 | 36      | 0.023   | 0.215  | 46.63           | -1.13                   | 0.35                | 37           | 37   |
| D-Tox              | 34       | 0.506    | 0.542   | 46.12            | -1.29                    | 0.28                 | 43      | 0.024   | 0.190  | 47.64           | -0.79                   | 0.50                | 38.5         | 38   |



|                            |    |       |       |       |       |      |    |        |       |       |       |      |      |      |
|----------------------------|----|-------|-------|-------|-------|------|----|--------|-------|-------|-------|------|------|------|
| D-Tox                      | 33 | 0.506 | 0.539 | 45.88 | -1.37 | 0.25 | 45 | 0.021  | 0.183 | 48.13 | -0.62 | 0.59 | 39   | 39.5 |
| Charlie's Minions          | 39 | 0.505 | 0.534 | 47.84 | -0.72 | 0.60 | 39 | 0.021  | 0.140 | 47.09 | -0.97 | 0.42 | 39   | 39.5 |
| CQB                        | 42 | 0.505 | 0.550 | 48.23 | -0.59 | 0.65 | 37 | 0.029  | 0.160 | 46.64 | -1.12 | 0.35 | 39.5 | 41   |
| FastRun                    | 36 | 0.505 | 0.531 | 46.64 | -1.12 | 0.36 | 46 | 0.017  | 0.144 | 48.44 | -0.52 | 0.65 | 41   | 42   |
| PNNL                       | 44 | 0.505 | 0.552 | 48.38 | -0.54 | 0.66 | 42 | 0.023  | 0.190 | 47.41 | -0.87 | 0.46 | 43   | 43   |
| Battelle Team              | 41 | 0.506 | 0.551 | 48.13 | -0.62 | 0.64 | 48 | 0.023  | 0.211 | 49.15 | -0.28 | 0.79 | 44.5 | 44   |
| YODAsttest                 | 51 | 0.505 | 0.548 | 50.40 | 0.13  | 1.00 | 41 | 0.024  | 0.194 | 47.35 | -0.88 | 0.46 | 46   | 45   |
| CASSIS                     | 46 | 0.505 | 0.552 | 48.96 | -0.35 | 0.78 | 49 | 0.020  | 0.202 | 49.19 | -0.27 | 0.79 | 47.5 | 46.5 |
| CQB                        | 61 | 0.503 | 0.541 | 51.77 | 0.59  | 1.00 | 34 | 0.024  | 0.143 | 46.52 | -1.16 | 0.35 | 47.5 | 46.5 |
| TeamRoslin                 | 45 | 0.505 | 0.538 | 48.44 | -0.52 | 0.66 | 53 | 0.018  | 0.170 | 49.84 | -0.05 | 0.89 | 49   | 48   |
| ICOS Team                  | 55 | 0.504 | 0.542 | 51.03 | 0.34  | 1.00 | 44 | 0.024  | 0.203 | 48.10 | -0.63 | 0.59 | 49.5 | 49   |
| FastRun                    | 47 | 0.504 | 0.536 | 49.60 | -0.13 | 0.94 | 54 | 0.014  | 0.143 | 50.23 | 0.08  | 0.97 | 50.5 | 50   |
| ICOS Team                  | 56 | 0.504 | 0.539 | 51.07 | 0.36  | 1.00 | 47 | 0.023  | 0.199 | 48.51 | -0.50 | 0.65 | 51.5 | 51   |
| CASSIS                     | 48 | 0.505 | 0.547 | 49.70 | -0.10 | 0.94 | 56 | 0.017  | 0.182 | 50.71 | 0.24  | 1.00 | 52   | 52   |
| CompModel-IGIB             | 50 | 0.504 | 0.538 | 49.88 | -0.04 | 0.96 | 58 | 0.014  | 0.155 | 51.14 | 0.38  | 1.00 | 54   | 53   |
| CompModel-IGIB             | 52 | 0.504 | 0.539 | 50.62 | 0.21  | 1.00 | 59 | 0.015  | 0.119 | 51.25 | 0.42  | 1.00 | 55.5 | 54   |
| TeamRoslin                 | 64 | 0.504 | 0.542 | 52.52 | 0.84  | 1.00 | 50 | 0.019  | 0.171 | 49.36 | -0.21 | 0.82 | 57   | 55.5 |
| mlcb                       | 53 | 0.504 | 0.539 | 50.82 | 0.27  | 1.00 | 61 | 0.014  | 0.175 | 51.75 | 0.58  | 1.00 | 57   | 55.5 |
| CytotoxicAvengers          | 63 | 0.503 | 0.532 | 52.02 | 0.67  | 1.00 | 52 | 0.016  | 0.155 | 49.46 | -0.18 | 0.82 | 57.5 | 57.5 |
| The fellowship of the ring | 60 | 0.504 | 0.541 | 51.66 | 0.55  | 1.00 | 55 | 0.016  | 0.190 | 50.47 | 0.16  | 1.00 | 57.5 | 57.5 |
| ICOS Team                  | 59 | 0.504 | 0.538 | 51.56 | 0.52  | 1.00 | 57 | 0.018  | 0.265 | 51.09 | 0.36  | 1.00 | 58   | 60   |
| Purdue Xie                 | 49 | 0.504 | 0.534 | 49.73 | -0.09 | 0.94 | 67 | 0.009  | 0.129 | 52.74 | 0.91  | 1.00 | 58   | 60   |
| UT_CCB                     | 65 | 0.502 | 0.536 | 52.87 | 0.96  | 1.00 | 51 | 0.016  | 0.165 | 49.43 | -0.19 | 0.82 | 58   | 60   |
| FastRun                    | 54 | 0.503 | 0.532 | 50.92 | 0.31  | 1.00 | 63 | 0.009  | 0.158 | 51.92 | 0.64  | 1.00 | 58.5 | 62   |
| FIN&al                     | 57 | 0.503 | 0.539 | 51.23 | 0.41  | 1.00 | 69 | 0.006  | 0.155 | 53.54 | 1.18  | 1.00 | 63   | 63   |
| CompModel-IGIB             | 62 | 0.503 | 0.534 | 51.85 | 0.62  | 1.00 | 65 | 0.013  | 0.162 | 52.18 | 0.73  | 1.00 | 63.5 | 64   |
| UTSW_QBRC_km45             | 58 | 0.504 | 0.547 | 51.26 | 0.42  | 1.00 | 72 | 0.013  | 0.194 | 53.89 | 1.30  | 1.00 | 65   | 65.5 |
| ICOS Team                  | 70 | 0.502 | 0.541 | 54.75 | 1.58  | 1.00 | 60 | 0.016  | 0.193 | 51.64 | 0.55  | 1.00 | 65   | 65.5 |
| CompModel-IGIB             | 67 | 0.503 | 0.536 | 53.56 | 1.19  | 1.00 | 64 | 0.014  | 0.163 | 52.05 | 0.69  | 1.00 | 65.5 | 67   |
| CytotoxicAvengers          | 69 | 0.502 | 0.536 | 54.46 | 1.49  | 1.00 | 66 | 0.007  | 0.153 | 52.27 | 0.76  | 1.00 | 67.5 | 68   |
| CytotoxicAvengers          | 71 | 0.502 | 0.540 | 54.99 | 1.66  | 1.00 | 68 | 0.007  | 0.150 | 53.27 | 1.09  | 1.00 | 69.5 | 69.5 |
| CompModel-IGIB             | 66 | 0.503 | 0.534 | 53.14 | 1.05  | 1.00 | 73 | 0.009  | 0.159 | 54.07 | 1.36  | 1.00 | 69.5 | 69.5 |
| The fellowship of the ring | 73 | 0.503 | 0.541 | 55.09 | 1.70  | 1.00 | 70 | 0.013  | 0.178 | 53.56 | 1.19  | 1.00 | 71.5 | 71   |
| CytotoxicAvengers          | 74 | 0.501 | 0.536 | 55.30 | 1.77  | 1.00 | 71 | 0.006  | 0.154 | 53.64 | 1.21  | 1.00 | 72.5 | 72   |
| sshh                       | 72 | 0.502 | 0.532 | 55.05 | 1.69  | 1.00 | 74 | 0.009  | 0.150 | 54.24 | 1.42  | 1.00 | 73   | 73   |
| TeamDaniel                 | 86 | 0.500 | 0.529 | 59.43 | 3.15  | 1.00 | 62 | 0.013  | 0.136 | 51.76 | 0.59  | 1.00 | 74   | 74   |
| mlcb                       | 75 | 0.502 | 0.538 | 56.21 | 2.07  | 1.00 | 76 | 0.003  | 0.151 | 55.59 | 1.87  | 1.00 | 75.5 | 75.5 |
| mlcb                       | 76 | 0.501 | 0.534 | 56.40 | 2.13  | 1.00 | 75 | 0.007  | 0.146 | 54.69 | 1.57  | 1.00 | 75.5 | 75.5 |
| FIN&al                     | 79 | 0.501 | 0.534 | 57.27 | 2.43  | 1.00 | 78 | 0.005  | 0.138 | 56.52 | 2.17  | 1.00 | 78.5 | 77   |
| RNlgroup                   | 78 | 0.500 | 0.543 | 57.18 | 2.39  | 1.00 | 83 | -0.001 | 0.144 | 57.32 | 2.44  | 1.00 | 80.5 | 78.5 |
| PNNL                       | 82 | 0.500 | 0.536 | 58.75 | 2.92  | 1.00 | 79 | 0.003  | 0.145 | 56.57 | 2.19  | 1.00 | 80.5 | 78.5 |

|                   |    |       |       |       |      |      |    |        |       |       |       |      |      |      |
|-------------------|----|-------|-------|-------|------|------|----|--------|-------|-------|-------|------|------|------|
| FastRun           | 77 | 0.500 | 0.528 | 57.02 | 2.34 | 1.00 | 86 | -0.003 | 0.132 | 57.96 | 2.65  | 1.00 | 81.5 | 80.5 |
| PNNL              | 83 | 0.500 | 0.538 | 59.05 | 3.02 | 1.00 | 80 | 0.003  | 0.142 | 56.60 | 2.20  | 1.00 | 81.5 | 80.5 |
| FastRun           | 80 | 0.500 | 0.531 | 57.46 | 2.49 | 1.00 | 84 | -0.003 | 0.162 | 57.40 | 2.47  | 1.00 | 82   | 82.5 |
| PNNL              | 87 | 0.500 | 0.532 | 59.60 | 3.20 | 1.00 | 77 | 0.003  | 0.155 | 56.48 | 2.16  | 1.00 | 82   | 82.5 |
| PNNL              | 84 | 0.500 | 0.537 | 59.10 | 3.04 | 1.00 | 81 | 0.003  | 0.143 | 56.75 | 2.25  | 1.00 | 82.5 | 84   |
| bioinfoCIPF       | 68 | 0.501 | 0.533 | 54.27 | 1.43 | 1.00 | 99 | NA     | NA    | 98.93 | 16.33 | 1.00 | 83.5 | 85   |
| FIN&al            | 81 | 0.501 | 0.531 | 58.31 | 2.77 | 1.00 | 88 | 0.000  | 0.151 | 59.46 | 3.16  | 1.00 | 84.5 | 86   |
| Charlie's Minions | 85 | 0.499 | 0.533 | 59.32 | 3.11 | 1.00 | 85 | -0.002 | 0.152 | 57.91 | 2.64  | 1.00 | 85   | 87   |
| TeamDaniel        | 89 | 0.499 | 0.524 | 60.27 | 3.43 | 1.00 | 82 | 0.000  | 0.104 | 56.99 | 2.33  | 1.00 | 85.5 | 88   |
| FIN&al            | 88 | 0.500 | 0.539 | 59.95 | 3.32 | 1.00 | 90 | -0.003 | 0.147 | 59.76 | 3.26  | 1.00 | 89   | 89.5 |
| FIN&al            | 91 | 0.499 | 0.529 | 61.09 | 3.70 | 1.00 | 87 | 0.000  | 0.168 | 58.23 | 2.75  | 1.00 | 89   | 89.5 |
| mlcb              | 90 | 0.499 | 0.554 | 60.89 | 3.63 | 1.00 | 89 | -0.007 | 0.212 | 59.52 | 3.18  | 1.00 | 89.5 | 91   |
| CQB               | 92 | 0.498 | 0.538 | 61.88 | 3.96 | 1.00 | 92 | -0.009 | 0.146 | 60.93 | 3.65  | 1.00 | 92   | 92   |
| UT_CCB            | 94 | 0.498 | 0.528 | 62.76 | 4.26 | 1.00 | 91 | -0.006 | 0.122 | 59.87 | 3.29  | 1.00 | 92.5 | 93   |
| Kaiju             | 93 | 0.498 | 0.525 | 62.49 | 4.17 | 1.00 | 95 | -0.019 | 0.114 | 66.79 | 5.60  | 1.00 | 94   | 94   |
| BorRfLm           | 96 | 0.499 | 0.537 | 64.65 | 4.89 | 1.00 | 93 | -0.007 | 0.152 | 63.22 | 4.41  | 1.00 | 94.5 | 95.5 |
| PCM               | 95 | 0.498 | 0.520 | 62.96 | 4.32 | 1.00 | 94 | -0.014 | 0.097 | 63.53 | 4.51  | 1.00 | 94.5 | 95.5 |
| Kaiju             | 97 | 0.496 | 0.525 | 66.41 | 5.47 | 1.00 | 97 | -0.023 | 0.119 | 68.64 | 6.22  | 1.00 | 97   | 97   |
| Kaiju             | 99 | 0.496 | 0.526 | 68.43 | 6.15 | 1.00 | 96 | -0.023 | 0.117 | 68.63 | 6.21  | 1.00 | 97.5 | 98   |
| Kaiju             | 98 | 0.496 | 0.524 | 67.56 | 5.86 | 1.00 | 98 | -0.023 | 0.116 | 69.23 | 6.42  | 1.00 | 98   | 99   |

[tables/SuppTable4Leaderboardfinal\\_sch1.pdf](#)

**Supplementary Table 5. Leaderboard subchallenge 2**

| team          | mean ranking PC | rank PC | PC <sub>m</sub> | PC <sub>m</sub> pval | PC <sub>q</sub> | PC <sub>q</sub> pval | PC Fisher pval | PC Fisher FDR | mean ranking SC | rank SC | SC <sub>m</sub> | SC <sub>m</sub> pval | SC <sub>q</sub> | SC <sub>q</sub> pval | SC Fisher pval | SC Fisher FDR | mean ranking | rank |
|---------------|-----------------|---------|-----------------|----------------------|-----------------|----------------------|----------------|---------------|-----------------|---------|-----------------|----------------------|-----------------|----------------------|----------------|---------------|--------------|------|
| QBRC          | 7               | 1       | 0.52            | 0.00                 | 0.37            | 0.00                 | 0.00           | 0.00          | 9               | 2       | 0.45            | 0.00                 | 0.40            | 0.00                 | 0.00           | 0.00          | 1.5          | 1.5  |
| QBRC          | 9               | 2       | 0.52            | 0.00                 | 0.31            | 0.01                 | 0.00           | 0.00          | 7               | 1       | 0.45            | 0.00                 | 0.48            | 0.00                 | 0.00           | 0.00          | 1.5          | 1.5  |
| QBRC          | 9               | 3       | 0.44            | 0.00                 | 0.34            | 0.01                 | 0.00           | 0.00          | 10              | 3       | 0.43            | 0.00                 | 0.45            | 0.00                 | 0.00           | 0.00          | 3.0          | 3.0  |
| QBRC          | 10              | 4       | 0.43            | 0.00                 | 0.34            | 0.01                 | 0.00           | 0.00          | 11              | 4       | 0.41            | 0.00                 | 0.45            | 0.00                 | 0.00           | 0.00          | 4.0          | 4.0  |
| QBRC          | 18              | 7       | 0.44            | 0.00                 | 0.19            | 0.09                 | 0.00           | 0.00          | 12              | 6       | 0.42            | 0.00                 | 0.38            | 0.00                 | 0.00           | 0.00          | 6.5          | 5.0  |
| mlcb          | 19              | 10      | 0.32            | 0.01                 | 0.28            | 0.03                 | 0.00           | 0.01          | 25              | 10      | 0.32            | 0.01                 | 0.31            | 0.02                 | 0.00           | 0.01          | 9.5          | 6.0  |
| newDream      | 20              | 12      | 0.56            | 0.00                 | 0.13            | 0.18                 | 0.00           | 0.00          | 21              | 8       | 0.34            | 0.01                 | 0.34            | 0.01                 | 0.00           | 0.00          | 10.0         | 7.0  |
| Battelle Team | 26              | 18      | 0.34            | 0.01                 | 0.15            | 0.16                 | 0.01           | 0.03          | 21              | 7       | 0.36            | 0.01                 | 0.33            | 0.01                 | 0.00           | 0.00          | 12.5         | 8.0  |
| Austria       | 13              | 6       | 0.65            | 0.00                 | 0.15            | 0.15                 | 0.00           | 0.00          | 32              | 20      | 0.72            | 0.00                 | 0.03            | 0.43                 | 0.00           | 0.00          | 12.8         | 9.5  |
| austria       | 13              | 6       | 0.65            | 0.00                 | 0.15            | 0.15                 | 0.00           | 0.00          | 32              | 20      | 0.72            | 0.00                 | 0.03            | 0.43                 | 0.00           | 0.00          | 12.8         | 9.5  |
| amss2012      | 24              | 17      | 0.27            | 0.03                 | 0.26            | 0.03                 | 0.01           | 0.03          | 25              | 12      | 0.25            | 0.04                 | 0.38            | 0.00                 | 0.00           | 0.01          | 14.3         | 11.0 |
| Austria       | 19              | 10      | 0.65            | 0.00                 | 0.12            | 0.20                 | 0.00           | 0.00          | 32              | 20      | 0.70            | 0.00                 | 0.04            | 0.40                 | 0.00           | 0.00          | 14.8         | 12.0 |
| Lasige        | 22              | 15      | 0.35            | 0.01                 | 0.15            | 0.15                 | 0.01           | 0.03          | 30              | 16      | 0.37            | 0.00                 | 0.16            | 0.13                 | 0.00           | 0.01          | 15.3         | 13.0 |
| Austria       | 19              | 10      | 0.65            | 0.00                 | 0.12            | 0.21                 | 0.00           | 0.00          | 34              | 25      | 0.72            | 0.00                 | 0.01            | 0.47                 | 0.00           | 0.00          | 17.3         | 14.5 |
| austria       | 19              | 10      | 0.65            | 0.00                 | 0.12            | 0.21                 | 0.00           | 0.00          | 34              | 25      | 0.72            | 0.00                 | 0.01            | 0.47                 | 0.00           | 0.00          | 17.3         | 14.5 |
| Lasige        | 21              | 14      | 0.40            | 0.00                 | 0.17            | 0.11                 | 0.00           | 0.01          | 33              | 22      | 0.38            | 0.00                 | 0.10            | 0.25                 | 0.01           | 0.02          | 18.0         | 16.0 |
| D-Tox         | 27              | 20      | 0.64            | 0.00                 | 0.09            | 0.26                 | 0.00           | 0.00          | 30              | 17      | 0.65            | 0.00                 | 0.07            | 0.31                 | 0.00           | 0.00          | 18.5         | 17.5 |
| Battelle Team | 32              | 24      | 0.30            | 0.02                 | 0.12            | 0.20                 | 0.02           | 0.07          | 27              | 13      | 0.36            | 0.01                 | 0.22            | 0.06                 | 0.00           | 0.01          | 18.5         | 17.5 |
| mlcb          | 37              | 34      | 0.30            | 0.02                 | 0.10            | 0.24                 | 0.03           | 0.07          | 12              | 5       | 0.45            | 0.00                 | 0.36            | 0.00                 | 0.00           | 0.00          | 19.3         | 19.0 |
| Battelle Team | 36              | 31      | 0.41            | 0.00                 | 0.06            | 0.34                 | 0.00           | 0.02          | 25              | 12      | 0.41            | 0.00                 | 0.18            | 0.10                 | 0.00           | 0.01          | 21.0         | 20.0 |
| Austria       | 20              | 13      | 0.66            | 0.00                 | 0.11            | 0.22                 | 0.00           | 0.00          | 38              | 35      | 0.69            | 0.00                 | 0.00            | 0.51                 | 0.00           | 0.00          | 23.8         | 21.0 |
| newDream      | 36              | 31      | 0.12            | 0.21                 | 0.20            | 0.08                 | 0.08           | 0.15          | 32              | 18      | 0.12            | 0.20                 | 0.45            | 0.00                 | 0.00           | 0.01          | 24.3         | 22.0 |
| amss2012      | 39              | 36      | 0.31            | 0.01                 | 0.07            | 0.32                 | 0.03           | 0.08          | 29              | 14      | 0.34            | 0.01                 | 0.23            | 0.05                 | 0.00           | 0.01          | 24.8         | 23.5 |
| Austria       | 26              | 19      | 0.65            | 0.00                 | 0.09            | 0.27                 | 0.00           | 0.00          | 36              | 31      | 0.72            | 0.00                 | 0.01            | 0.47                 | 0.00           | 0.00          | 24.8         | 23.5 |
| TeamDaniel    | 35              | 29      | 0.10            | 0.24                 | 0.24            | 0.05                 | 0.06           | 0.13          | 34              | 23      | 0.13            | 0.19                 | 0.35            | 0.01                 | 0.01           | 0.03          | 25.8         | 25.0 |
| D-Tox         | 35              | 27      | 0.64            | 0.00                 | -0.02           | 0.56                 | 0.00           | 0.00          | 35              | 27      | 0.65            | 0.00                 | 0.03            | 0.42                 | 0.00           | 0.00          | 27.0         | 26.5 |
| mlcb          | 44              | 45      | 0.28            | 0.03                 | 0.04            | 0.40                 | 0.06           | 0.13          | 25              | 10      | 0.40            | 0.00                 | 0.19            | 0.09                 | 0.00           | 0.01          | 27.0         | 26.5 |
| Kaiju         | 31              | 22      | 0.13            | 0.19                 | 0.28            | 0.02                 | 0.03           | 0.08          | 38              | 36      | 0.16            | 0.13                 | 0.24            | 0.05                 | 0.04           | 0.07          | 29.0         | 28.5 |
| Experimental  | 44              | 43      | 0.17            | 0.12                 | 0.11            | 0.23                 | 0.12           | 0.20          | 30              | 16      | 0.36            | 0.00                 | 0.17            | 0.12                 | 0.00           | 0.01          | 29.0         | 28.5 |
| Kaiju         | 32              | 26      | 0.10            | 0.24                 | 0.29            | 0.02                 | 0.03           | 0.08          | 37              | 33      | 0.18            | 0.10                 | 0.24            | 0.05                 | 0.03           | 0.06          | 29.3         | 30.0 |
| Kaiju         | 28              | 21      | 0.13            | 0.19                 | 0.31            | 0.02                 | 0.02           | 0.06          | 39              | 39      | 0.16            | 0.13                 | 0.24            | 0.05                 | 0.04           | 0.07          | 29.8         | 31.0 |
| Kaiju         | 31              | 23      | 0.14            | 0.16                 | 0.23            | 0.05                 | 0.05           | 0.10          | 38              | 37      | 0.19            | 0.09                 | 0.23            | 0.05                 | 0.03           | 0.06          | 30.0         | 32.0 |
| amss2012      | 23              | 16      | 0.26            | 0.03                 | 0.28            | 0.02                 | 0.01           | 0.02          | 47              | 51      | 0.05            | 0.37                 | 0.26            | 0.04                 | 0.07           | 0.10          | 33.5         | 33.5 |

|                |    |    |       |      |       |      |      |      |    |    |       |      |       |      |      |      |      |      |
|----------------|----|----|-------|------|-------|------|------|------|----|----|-------|------|-------|------|------|------|------|------|
| TeamPal        | 35 | 29 | 0.12  | 0.21 | 0.22  | 0.06 | 0.07 | 0.14 | 39 | 39 | 0.10  | 0.25 | 0.30  | 0.02 | 0.03 | 0.06 | 33.5 | 33.5 |
| FIN&al         | 41 | 38 | 0.30  | 0.02 | 0.07  | 0.32 | 0.03 | 0.08 | 36 | 31 | 0.33  | 0.01 | 0.14  | 0.17 | 0.01 | 0.03 | 34.0 | 35.0 |
| Experimental   | 43 | 41 | 0.24  | 0.05 | 0.08  | 0.30 | 0.07 | 0.14 | 35 | 29 | 0.30  | 0.02 | 0.18  | 0.11 | 0.01 | 0.03 | 35.0 | 36.0 |
| Experimental   | 47 | 50 | 0.14  | 0.17 | 0.10  | 0.24 | 0.17 | 0.26 | 34 | 25 | 0.32  | 0.01 | 0.18  | 0.11 | 0.01 | 0.03 | 37.5 | 37.0 |
| amss2012       | 45 | 48 | 0.19  | 0.09 | 0.08  | 0.30 | 0.12 | 0.20 | 35 | 28 | 0.36  | 0.01 | 0.10  | 0.25 | 0.01 | 0.03 | 38.0 | 38.0 |
| Lasige         | 43 | 39 | 0.35  | 0.01 | -0.03 | 0.58 | 0.02 | 0.07 | 41 | 41 | 0.33  | 0.01 | 0.08  | 0.30 | 0.02 | 0.04 | 40.0 | 39.0 |
| CompModel-IGIB | 45 | 47 | 0.17  | 0.12 | 0.10  | 0.24 | 0.13 | 0.20 | 38 | 35 | 0.25  | 0.04 | 0.19  | 0.10 | 0.03 | 0.05 | 40.5 | 40.0 |
| Experimental   | 47 | 50 | 0.28  | 0.03 | -0.01 | 0.52 | 0.07 | 0.14 | 37 | 32 | 0.34  | 0.01 | 0.09  | 0.26 | 0.01 | 0.03 | 41.0 | 41.0 |
| Opiyo          | 32 | 26 | 0.18  | 0.11 | 0.16  | 0.14 | 0.08 | 0.15 | 52 | 58 | 0.09  | 0.26 | 0.12  | 0.21 | 0.21 | 0.26 | 41.5 | 42.0 |
| Battelle Team  | 37 | 34 | 0.43  | 0.00 | 0.00  | 0.51 | 0.00 | 0.02 | 47 | 53 | 0.26  | 0.03 | 0.06  | 0.34 | 0.06 | 0.09 | 43.3 | 43.5 |
| Lasige         | 41 | 38 | 0.55  | 0.00 | -0.07 | 0.69 | 0.00 | 0.00 | 44 | 49 | 0.51  | 0.00 | -0.04 | 0.62 | 0.00 | 0.00 | 43.3 | 43.5 |
| D-Tox          | 45 | 47 | 0.64  | 0.00 | -0.11 | 0.78 | 0.00 | 0.00 | 42 | 43 | 0.65  | 0.00 | -0.02 | 0.56 | 0.00 | 0.00 | 44.5 | 45.0 |
| Experimental   | 49 | 53 | 0.24  | 0.05 | -0.01 | 0.53 | 0.11 | 0.19 | 40 | 40 | 0.30  | 0.02 | 0.10  | 0.24 | 0.03 | 0.06 | 46.5 | 46.0 |
| UT_CCB         | 39 | 36 | 0.09  | 0.27 | 0.20  | 0.08 | 0.10 | 0.17 | 53 | 61 | 0.13  | 0.18 | 0.08  | 0.30 | 0.21 | 0.26 | 48.0 | 47.0 |
| Opiyo          | 36 | 32 | 0.12  | 0.21 | 0.20  | 0.09 | 0.09 | 0.16 | 55 | 65 | 0.01  | 0.47 | 0.15  | 0.15 | 0.26 | 0.31 | 48.5 | 48.0 |
| FIN&al         | 47 | 52 | 0.29  | 0.02 | -0.02 | 0.55 | 0.07 | 0.14 | 43 | 46 | 0.31  | 0.01 | 0.08  | 0.29 | 0.03 | 0.06 | 49.0 | 49.0 |
| Opiyo          | 44 | 43 | 0.03  | 0.42 | 0.21  | 0.07 | 0.13 | 0.20 | 52 | 58 | -0.02 | 0.55 | 0.23  | 0.05 | 0.13 | 0.17 | 50.0 | 50.0 |
| FIN&al         | 51 | 60 | 0.34  | 0.01 | -0.09 | 0.73 | 0.04 | 0.08 | 42 | 43 | 0.37  | 0.00 | 0.03  | 0.42 | 0.01 | 0.03 | 51.3 | 51.0 |
| ICOS Team      | 50 | 57 | 0.09  | 0.27 | 0.11  | 0.22 | 0.23 | 0.31 | 43 | 46 | 0.08  | 0.29 | 0.27  | 0.03 | 0.05 | 0.07 | 51.5 | 53.5 |
| ICOS Team      | 50 | 57 | 0.09  | 0.27 | 0.11  | 0.22 | 0.23 | 0.31 | 43 | 46 | 0.08  | 0.29 | 0.27  | 0.03 | 0.05 | 0.07 | 51.5 | 53.5 |
| ICOS Team      | 50 | 57 | 0.09  | 0.27 | 0.11  | 0.22 | 0.23 | 0.31 | 43 | 46 | 0.08  | 0.29 | 0.27  | 0.03 | 0.05 | 0.07 | 51.5 | 53.5 |
| ICOS Team      | 50 | 57 | 0.09  | 0.27 | 0.11  | 0.22 | 0.23 | 0.31 | 43 | 46 | 0.08  | 0.29 | 0.27  | 0.03 | 0.05 | 0.07 | 51.5 | 53.5 |
| Lasige         | 44 | 45 | 0.35  | 0.01 | -0.05 | 0.64 | 0.03 | 0.08 | 54 | 62 | 0.37  | 0.00 | -0.14 | 0.83 | 0.02 | 0.05 | 53.3 | 56.0 |
| mlcb           | 50 | 57 | 0.46  | 0.00 | -0.22 | 0.94 | 0.00 | 0.01 | 48 | 54 | 0.57  | 0.00 | -0.13 | 0.81 | 0.00 | 0.00 | 55.5 | 57.0 |
| newDream       | 55 | 63 | -0.15 | 0.84 | 0.13  | 0.18 | 0.44 | 0.54 | 46 | 50 | -0.09 | 0.74 | 0.34  | 0.01 | 0.04 | 0.07 | 56.5 | 58.0 |
| Battelle Team  | 43 | 40 | -0.09 | 0.74 | 0.29  | 0.02 | 0.08 | 0.15 | 63 | 74 | -0.03 | 0.59 | 0.08  | 0.29 | 0.47 | 0.51 | 57.0 | 59.0 |
| Opiyo          | 47 | 50 | 0.12  | 0.20 | 0.11  | 0.22 | 0.18 | 0.27 | 56 | 68 | 0.12  | 0.19 | 0.07  | 0.32 | 0.23 | 0.29 | 59.0 | 60.5 |
| newDream       | 57 | 66 | -0.31 | 0.99 | 0.13  | 0.18 | 0.48 | 0.56 | 47 | 52 | -0.09 | 0.74 | 0.34  | 0.01 | 0.04 | 0.07 | 59.0 | 60.5 |
| newDream       | 56 | 64 | -0.23 | 0.95 | 0.13  | 0.18 | 0.47 | 0.55 | 48 | 55 | -0.29 | 0.98 | 0.34  | 0.01 | 0.05 | 0.07 | 59.5 | 62.0 |
| borRf          | 50 | 54 | 0.33  | 0.01 | -0.08 | 0.72 | 0.04 | 0.10 | 56 | 66 | 0.32  | 0.01 | -0.03 | 0.59 | 0.04 | 0.07 | 60.0 | 63.0 |
| ssh            | 58 | 68 | 0.29  | 0.02 | -0.17 | 0.87 | 0.08 | 0.15 | 51 | 56 | 0.24  | 0.04 | 0.06  | 0.35 | 0.08 | 0.12 | 62.0 | 64.0 |
| RNIgroup       | 52 | 61 | -0.02 | 0.57 | 0.15  | 0.16 | 0.30 | 0.40 | 56 | 68 | 0.05  | 0.38 | 0.13  | 0.19 | 0.26 | 0.31 | 64.5 | 65.0 |
| CompModel-IGIB | 63 | 72 | 0.10  | 0.26 | -0.05 | 0.64 | 0.46 | 0.55 | 53 | 59 | 0.23  | 0.06 | 0.05  | 0.35 | 0.10 | 0.14 | 65.3 | 67.0 |
| FIN&al         | 58 | 67 | 0.23  | 0.06 | -0.09 | 0.73 | 0.17 | 0.26 | 55 | 64 | 0.27  | 0.03 | -0.01 | 0.53 | 0.08 | 0.11 | 65.3 | 67.0 |

|                    |    |    |       |      |       |      |      |      |    |    |       |      |       |      |      |      |      |      |
|--------------------|----|----|-------|------|-------|------|------|------|----|----|-------|------|-------|------|------|------|------|------|
| UT_CCB             | 61 | 70 | 0.07  | 0.32 | -0.03 | 0.41 | 0.39 | 0.50 | 53 | 61 | 0.23  | 0.05 | 0.03  | 0.41 | 0.10 | 0.14 | 65.3 | 67.0 |
| UT_CCB             | 60 | 69 | 0.16  | 0.13 | -0.08 | 0.70 | 0.31 | 0.40 | 55 | 64 | 0.26  | 0.04 | 0.00  | 0.50 | 0.09 | 0.13 | 66.3 | 69.0 |
| UT_CCB             | 57 | 65 | 0.17  | 0.11 | -0.06 | 0.66 | 0.27 | 0.36 | 61 | 72 | 0.26  | 0.04 | -0.05 | 0.63 | 0.11 | 0.15 | 68.5 | 70.0 |
| FIN&al             | 55 | 62 | 0.17  | 0.11 | -0.06 | 0.66 | 0.27 | 0.36 | 65 | 77 | 0.23  | 0.05 | -0.06 | 0.65 | 0.15 | 0.20 | 69.3 | 71.0 |
| Kaiju              | 63 | 72 | 0.04  | 0.39 | 0.03  | 0.43 | 0.46 | 0.55 | 56 | 68 | 0.06  | 0.34 | 0.10  | 0.24 | 0.29 | 0.33 | 69.8 | 72.0 |
| CompModel-IGIB     | 67 | 75 | -0.02 | 0.55 | -0.01 | 0.52 | 0.64 | 0.70 | 58 | 71 | 0.13  | 0.19 | 0.04  | 0.39 | 0.27 | 0.32 | 73.0 | 73.0 |
| TeamPal            | 71 | 77 | 0.02  | 0.43 | -0.07 | 0.68 | 0.66 | 0.71 | 57 | 70 | 0.01  | 0.48 | 0.14  | 0.17 | 0.28 | 0.33 | 73.5 | 74.5 |
| RNIgroup           | 67 | 74 | 0.05  | 0.36 | -0.04 | 0.60 | 0.55 | 0.63 | 62 | 73 | 0.06  | 0.33 | 0.06  | 0.34 | 0.36 | 0.39 | 73.5 | 74.5 |
| UT_CCB             | 63 | 73 | 0.10  | 0.25 | -0.06 | 0.66 | 0.46 | 0.55 | 65 | 77 | 0.22  | 0.06 | -0.05 | 0.64 | 0.16 | 0.21 | 74.8 | 76.0 |
| TeamPal            | 75 | 80 | 0.00  | 0.51 | -0.09 | 0.72 | 0.74 | 0.77 | 63 | 75 | -0.08 | 0.71 | 0.09  | 0.26 | 0.50 | 0.53 | 77.5 | 77.0 |
| CompModel-IGIB     | 74 | 79 | 0.08  | 0.30 | -0.11 | 0.79 | 0.58 | 0.66 | 68 | 78 | 0.15  | 0.15 | -0.05 | 0.64 | 0.32 | 0.36 | 78.3 | 78.0 |
| mlcb               | 74 | 79 | 0.08  | 0.30 | -0.14 | 0.84 | 0.60 | 0.67 | 71 | 80 | 0.06  | 0.33 | -0.01 | 0.53 | 0.49 | 0.52 | 79.3 | 79.0 |
| Kalpesh Shelke     | 68 | 76 | -0.09 | 0.73 | 0.00  | 0.51 | 0.74 | 0.77 | 78 | 84 | -0.11 | 0.77 | -0.02 | 0.54 | 0.78 | 0.79 | 80.0 | 80.0 |
| CompModel-IGIB     | 75 | 82 | 0.07  | 0.31 | -0.15 | 0.84 | 0.61 | 0.67 | 69 | 79 | 0.16  | 0.14 | -0.08 | 0.72 | 0.33 | 0.37 | 80.3 | 81.0 |
| TeamDaniel         | 75 | 82 | 0.02  | 0.44 | -0.09 | 0.74 | 0.69 | 0.73 | 75 | 83 | 0.01  | 0.48 | -0.03 | 0.57 | 0.63 | 0.65 | 82.0 | 82.0 |
| WarwickDataScience | 80 | 84 | 0.01  | 0.46 | -0.17 | 0.89 | 0.78 | 0.79 | 73 | 81 | 0.09  | 0.27 | -0.08 | 0.71 | 0.51 | 0.53 | 82.5 | 83.0 |
| Opiyo              | 79 | 83 | -0.13 | 0.81 | -0.10 | 0.76 | 0.91 | 0.92 | 75 | 83 | -0.04 | 0.60 | -0.01 | 0.53 | 0.68 | 0.70 | 82.8 | 84.0 |
| Team Rocket        | 81 | 85 | -0.23 | 0.95 | -0.10 | 0.76 | 0.96 | 0.96 | 81 | 85 | -0.26 | 0.97 | -0.04 | 0.62 | 0.91 | 0.91 | 85.0 | 85.0 |

[tables/SuppTable5Leaderboardfinal\\_sch2.pdf](tables/SuppTable5Leaderboardfinal_sch2.pdf)

## Supplementary Table 6. Additional data and methods used

| Subchallenge 1                                                                         |  |
|----------------------------------------------------------------------------------------|--|
| <b>other input data</b>                                                                |  |
| KEGG pathway                                                                           |  |
| EQTLs                                                                                  |  |
| known drug targets                                                                     |  |
| chemicals fingerprints                                                                 |  |
| BioAssay data                                                                          |  |
| predicted toxicity data                                                                |  |
| Drug2Gene database ( <a href="http://www.drug2gene.com">http://www.drug2gene.com</a> ) |  |
| Connectivity Map (Lamb 2006)                                                           |  |
| GO toxicity terms                                                                      |  |
| additional 1d,2d&3d attributes                                                         |  |
| signaling pathways                                                                     |  |
| genesets summaries                                                                     |  |
| paradigm pathways summaries                                                            |  |
| SNP mapped gene sets summaries                                                         |  |
| Population types                                                                       |  |
| <b>other dimension reduction</b>                                                       |  |
| use the gene expression as an intermediate featur                                      |  |
| Locality-Sensitive Hashing and Singular Value Decomposition                            |  |
| <b>other prediction algorithm</b>                                                      |  |
| Systematic growth algorithm                                                            |  |
| Neural network                                                                         |  |
| Conditional Inference Trees                                                            |  |
| Random Number Generator                                                                |  |
| <b>other model validation</b>                                                          |  |
| repeated random sub-sampling validation                                                |  |
| bootstrapping                                                                          |  |
| 4-fold cross validation: 3 folds for training, 1 fold for validation                   |  |
| computing best $\gamma$ and cost parameters among different values tested              |  |

| Subchallenge 2                                                       |  |
|----------------------------------------------------------------------|--|
| <b>other input data</b>                                              |  |
| Chemical attributes (Dragon)                                         |  |
| ChEMBL                                                               |  |
| PubChem                                                              |  |
| Binary Fingerprints                                                  |  |
| chemicals fingerprints                                               |  |
| BioAssay data                                                        |  |
| predicted toxicity data                                              |  |
| ECP chemical descriptors, based on the SDF files provided.           |  |
| additional 1d, 2d&3d chemical attributes                             |  |
| SNP mapped gene sets summaries                                       |  |
| Population types                                                     |  |
| Pentacles                                                            |  |
| Volsurf                                                              |  |
| PubChem Fingerprints                                                 |  |
| Maccs Fingerprints                                                   |  |
| 1D&2D physio-chemical descriptors                                    |  |
| Population effects                                                   |  |
| <b>other dimension reduction</b>                                     |  |
| use the gene expression as an intermediate featur                    |  |
| Locality-Sensitive Hashing and Singular Value Decomposition          |  |
| <b>other prediction algorithm</b>                                    |  |
| remove descriptors with high pair wise correlation                   |  |
| <b>other prediction algorithm</b>                                    |  |
| Pharmacological Analoging                                            |  |
| Neural network                                                       |  |
| nearest neighbors                                                    |  |
| <b>other model validation</b>                                        |  |
| repeated random sub-sampling validation                              |  |
| bootstrapping                                                        |  |
| 2-fold cross-validation                                              |  |
| 4-fold cross validation: 3 folds for training, 1 fold for validation |  |

[tables/SuppTable6\\_additionalMethodsData.pdf](tables/SuppTable6_additionalMethodsData.pdf)

**Supplementary Table 7. Scores subchallenge 1 considering all 106 compounds**

| team               | mean PC | max PC | mean ranking PC | rank PC | mean PCI | max PCI | mean ranking PCI | rank PCI |
|--------------------|---------|--------|-----------------|---------|----------|---------|------------------|----------|
| Yang_Lab           | 0.05    | 0.23   | 34.40           | 3       | 0.51     | 0.55    | 30.42            | 1        |
| UT_CCB             | 0.07    | 0.28   | 28.01           | 1       | 0.51     | 0.56    | 35.83            | 4        |
| CASSIS             | 0.04    | 0.22   | 36.12           | 4       | 0.51     | 0.56    | 33.32            | 2        |
| amss2012           | 0.04    | 0.21   | 37.47           | 5       | 0.51     | 0.55    | 35.78            | 3        |
| O6d0A              | 0.04    | 0.19   | 38.73           | 7       | 0.51     | 0.55    | 37.37            | 5        |
| Yang_Lab           | 0.04    | 0.23   | 39.68           | 10      | 0.51     | 0.55    | 38.14            | 6        |
| UT_CCB             | 0.05    | 0.19   | 33.19           | 2       | 0.51     | 0.54    | 40.69            | 14       |
| Yang_Lab           | 0.04    | 0.21   | 38.83           | 8       | 0.51     | 0.55    | 38.55            | 9        |
| D-Tox              | 0.04    | 0.28   | 38.67           | 6       | 0.51     | 0.55    | 39.82            | 13       |
| CQB                | 0.04    | 0.22   | 39.90           | 11      | 0.51     | 0.55    | 38.53            | 8        |
| Yang_Lab           | 0.04    | 0.22   | 38.93           | 9       | 0.51     | 0.56    | 39.29            | 11       |
| WarwickDataScience | 0.03    | 0.19   | 40.27           | 12      | 0.51     | 0.55    | 38.97            | 10       |
| Yang_Lab           | 0.03    | 0.20   | 41.44           | 15      | 0.51     | 0.55    | 38.27            | 7        |
| CASSIS             | 0.03    | 0.21   | 41.42           | 14      | 0.51     | 0.55    | 39.59            | 12       |
| Kaiju              | 0.03    | 0.20   | 42.26           | 16      | 0.51     | 0.54    | 41.69            | 15       |
| CQB                | 0.03    | 0.17   | 40.42           | 13      | 0.51     | 0.54    | 43.85            | 20       |
| WarwickDataScience | 0.03    | 0.18   | 44.05           | 18      | 0.51     | 0.54    | 43.11            | 16       |
| UTSW_QBRC          | 0.03    | 0.22   | 42.96           | 17      | 0.51     | 0.55    | 44.28            | 21       |
| WarwickDataScience | 0.03    | 0.19   | 44.31           | 20      | 0.51     | 0.54    | 43.32            | 18       |
| CASSIS             | 0.03    | 0.23   | 44.21           | 19      | 0.51     | 0.55    | 44.60            | 22       |
| QBRC_UTSW_km48     | 0.02    | 0.21   | 45.14           | 23      | 0.51     | 0.55    | 43.81            | 19       |
| amss2012           | 0.03    | 0.19   | 44.36           | 22      | 0.51     | 0.55    | 44.72            | 23       |
| WarwickDataScience | 0.03    | 0.19   | 45.69           | 29      | 0.51     | 0.54    | 43.26            | 17       |
| UT_CCB             | 0.02    | 0.17   | 44.35           | 21      | 0.51     | 0.54    | 44.97            | 26       |
| WarwickDataScience | 0.03    | 0.17   | 45.17           | 24      | 0.51     | 0.54    | 45.10            | 29       |
| UTSW_QBRC_km36     | 0.02    | 0.21   | 45.68           | 28      | 0.51     | 0.55    | 44.98            | 27       |
| MPIMG              | 0.02    | 0.22   | 45.46           | 25      | 0.51     | 0.55    | 45.31            | 30       |
| D-Tox              | 0.03    | 0.22   | 46.09           | 32      | 0.51     | 0.55    | 44.87            | 24       |
| D-Tox              | 0.03    | 0.22   | 45.81           | 30      | 0.51     | 0.55    | 45.03            | 28       |
| NEXUS              | 0.02    | 0.20   | 45.57           | 26      | 0.51     | 0.54    | 46.59            | 34       |
| D-Tox              | 0.02    | 0.18   | 46.87           | 35      | 0.51     | 0.54    | 44.95            | 25       |
| YODAsttest         | 0.02    | 0.20   | 45.95           | 31      | 0.51     | 0.55    | 46.09            | 33       |
| UTSW_QBRC          | 0.02    | 0.22   | 46.56           | 34      | 0.51     | 0.55    | 46.07            | 32       |
| D-Tox              | 0.02    | 0.19   | 47.50           | 39      | 0.51     | 0.54    | 45.76            | 31       |
| TeamRoslin         | 0.03    | 0.26   | 45.59           | 27      | 0.51     | 0.54    | 48.30            | 43.5     |
| MPIMG              | 0.02    | 0.22   | 46.42           | 33      | 0.50     | 0.55    | 48.13            | 41       |
| Charlie's Minions  | 0.02    | 0.14   | 47.04           | 36      | 0.50     | 0.53    | 47.93            | 39       |
| mlcb               | 0.02    | 0.18   | 47.58           | 40      | 0.51     | 0.54    | 47.52            | 35       |

|                            |      |      |       |    |      |      |       |      |
|----------------------------|------|------|-------|----|------|------|-------|------|
| amss2012                   | 0.02 | 0.19 | 48.37 | 43 | 0.51 | 0.54 | 47.53 | 36   |
| CytotoxicAvengers          | 0.02 | 0.16 | 47.23 | 37 | 0.50 | 0.54 | 48.30 | 43.5 |
| PNNL                       | 0.02 | 0.19 | 48.02 | 41 | 0.51 | 0.55 | 48.00 | 40   |
| Battelle Team              | 0.02 | 0.21 | 48.97 | 48 | 0.51 | 0.55 | 47.64 | 37   |
| FastRun                    | 0.01 | 0.14 | 49.93 | 53 | 0.50 | 0.53 | 47.67 | 38   |
| CompModel-IGIB             | 0.02 | 0.14 | 48.48 | 46 | 0.50 | 0.54 | 48.80 | 45   |
| TeamRoslin                 | 0.02 | 0.17 | 49.28 | 50 | 0.51 | 0.54 | 48.19 | 42   |
| YODAsttest                 | 0.02 | 0.19 | 47.36 | 38 | 0.50 | 0.55 | 50.96 | 54   |
| CQB                        | 0.02 | 0.16 | 48.46 | 45 | 0.50 | 0.55 | 49.26 | 48   |
| CASSIS                     | 0.02 | 0.20 | 49.29 | 51 | 0.51 | 0.55 | 49.01 | 46   |
| ICOS Team                  | 0.02 | 0.20 | 48.41 | 44 | 0.50 | 0.54 | 51.64 | 57   |
| FastRun                    | 0.01 | 0.18 | 49.99 | 54 | 0.50 | 0.54 | 49.04 | 47   |
| UT_CCB                     | 0.02 | 0.17 | 48.28 | 42 | 0.50 | 0.54 | 52.14 | 61   |
| CASSIS                     | 0.02 | 0.18 | 50.27 | 57 | 0.50 | 0.55 | 49.43 | 49   |
| ICOS Team                  | 0.02 | 0.20 | 49.12 | 49 | 0.50 | 0.54 | 51.87 | 58   |
| mlcb                       | 0.02 | 0.18 | 50.28 | 58 | 0.50 | 0.54 | 49.97 | 50   |
| The fellowship of the ring | 0.01 | 0.19 | 50.12 | 56 | 0.50 | 0.54 | 51.42 | 56   |
| CompModel-IGIB             | 0.01 | 0.16 | 50.95 | 59 | 0.50 | 0.54 | 50.36 | 53   |
| CQB                        | 0.02 | 0.14 | 48.67 | 47 | 0.50 | 0.54 | 52.82 | 65   |
| Purdue Xie                 | 0.01 | 0.13 | 51.77 | 62 | 0.50 | 0.54 | 50.22 | 51   |
| FIN&al                     | 0.01 | 0.16 | 52.15 | 63 | 0.50 | 0.54 | 50.29 | 52   |
| TeamRoslin                 | 0.02 | 0.26 | 50.07 | 55 | 0.50 | 0.54 | 52.25 | 62   |
| CytotoxicAvengers          | 0.01 | 0.16 | 49.84 | 52 | 0.50 | 0.53 | 53.68 | 67   |
| ICOS Team                  | 0.01 | 0.27 | 51.58 | 60 | 0.50 | 0.54 | 52.39 | 63   |
| CompModel-IGIB             | 0.01 | 0.16 | 52.72 | 68 | 0.50 | 0.53 | 51.06 | 55   |
| FastRun                    | 0.01 | 0.16 | 52.44 | 64 | 0.50 | 0.53 | 52.09 | 59.5 |
| UTSW_QBRC_km45             | 0.01 | 0.19 | 53.31 | 69 | 0.50 | 0.55 | 52.09 | 59.5 |
| ICOS Team                  | 0.01 | 0.19 | 51.61 | 61 | 0.50 | 0.54 | 54.99 | 71   |
| CompModel-IGIB             | 0.01 | 0.16 | 52.62 | 67 | 0.50 | 0.54 | 52.94 | 66   |
| CytotoxicAvengers          | 0.01 | 0.15 | 52.59 | 66 | 0.50 | 0.54 | 54.39 | 68   |
| CompModel-IGIB             | 0.01 | 0.16 | 54.16 | 75 | 0.50 | 0.53 | 52.54 | 64   |
| CytotoxicAvengers          | 0.01 | 0.15 | 53.36 | 70 | 0.50 | 0.54 | 55.02 | 72   |
| The fellowship of the ring | 0.01 | 0.18 | 53.47 | 72 | 0.50 | 0.54 | 54.70 | 70   |
| sshh                       | 0.01 | 0.15 | 53.52 | 73 | 0.50 | 0.53 | 54.42 | 69   |
| mlcb                       | 0.01 | 0.15 | 53.38 | 71 | 0.50 | 0.53 | 55.68 | 74   |
| CytotoxicAvengers          | 0.00 | 0.15 | 53.58 | 74 | 0.50 | 0.54 | 55.18 | 73   |
| PNNL                       | 0.00 | 0.16 | 54.89 | 77 | 0.50 | 0.53 | 56.26 | 76   |
| TeamDaniel                 | 0.01 | 0.14 | 52.56 | 65 | 0.50 | 0.53 | 59.94 | 91   |
| TeamDaniel                 | 0.00 | 0.11 | 54.51 | 76 | 0.50 | 0.52 | 57.30 | 81   |
| RNIgroup                   | 0.00 | 0.14 | 55.88 | 81 | 0.50 | 0.54 | 56.46 | 78   |
| mlcb                       | 0.00 | 0.15 | 56.20 | 82 | 0.50 | 0.54 | 56.45 | 77   |
| PNNL                       | 0.00 | 0.14 | 55.31 | 78 | 0.50 | 0.54 | 57.48 | 82   |



|                   |       |      |       |    |      |      |       |    |
|-------------------|-------|------|-------|----|------|------|-------|----|
| PNNL              | 0.00  | 0.15 | 55.51 | 79 | 0.50 | 0.54 | 57.58 | 83 |
| FastRun           | 0.00  | 0.16 | 56.44 | 84 | 0.50 | 0.53 | 57.20 | 80 |
| PNNL              | 0.00  | 0.14 | 55.68 | 80 | 0.50 | 0.54 | 57.93 | 85 |
| FastRun           | -0.01 | 0.13 | 57.84 | 88 | 0.50 | 0.53 | 56.56 | 79 |
| FIN&al            | 0.00  | 0.17 | 57.09 | 87 | 0.50 | 0.54 | 57.90 | 84 |
| Charlie's Minions | 0.00  | 0.15 | 56.86 | 85 | 0.50 | 0.53 | 58.91 | 87 |
| bioinfoCIPF       | NA    | NA   | 98.94 | 99 | 0.50 | 0.53 | 55.72 | 75 |
| FIN&al            | 0.00  | 0.17 | 56.41 | 83 | 0.50 | 0.53 | 60.48 | 92 |
| mlcb              | 0.00  | 0.21 | 57.01 | 86 | 0.50 | 0.55 | 59.43 | 89 |
| FIN&al            | 0.00  | 0.14 | 58.33 | 90 | 0.50 | 0.53 | 58.85 | 86 |
| PCM               | -0.01 | 0.12 | 59.75 | 91 | 0.50 | 0.52 | 59.15 | 88 |
| UT_CCB            | -0.01 | 0.12 | 58.22 | 89 | 0.50 | 0.53 | 60.63 | 93 |
| FIN&al            | -0.01 | 0.15 | 60.85 | 93 | 0.50 | 0.53 | 59.89 | 90 |
| CQB               | -0.01 | 0.15 | 60.70 | 92 | 0.50 | 0.54 | 61.41 | 94 |
| BorRfLm           | -0.01 | 0.15 | 62.04 | 94 | 0.50 | 0.54 | 63.49 | 96 |
| Kaiju             | -0.02 | 0.11 | 67.44 | 95 | 0.50 | 0.53 | 62.83 | 95 |
| Kaiju             | -0.03 | 0.12 | 68.61 | 96 | 0.50 | 0.53 | 66.26 | 97 |
| Kaiju             | -0.02 | 0.12 | 68.63 | 98 | 0.50 | 0.52 | 66.94 | 98 |
| Kaiju             | -0.02 | 0.12 | 68.62 | 97 | 0.50 | 0.53 | 68.20 | 99 |

<tables/SuppTable7/leaderboardSch1AllCompounds.pdf>
