# Supplementary material
Source: PubMed Central journal article supplement (PMC7416662)
Supplement: 41587_2015_BFnbt3299_MOESM23_ESM.pdf [file 41587_2015_BFnbt3299_MOESM23_ESM.pdf]

## 3 - Predictive Models Used In This Challenge

### Guide to Submissions to the NIEHS-NCATS-UNC DREAM Toxicogenetics Challenge

Participants in the [NIEHS-NCATS-UNC DREAM Toxicogenetics Challenge](#) were provided with training data giving a measure of cytotoxicity (EC10) for each of 487 cell lines derived from the [1000 Genomes Project](#).

There were 2 parts to the challenge with separate winners in each category. In [Subchallenge 1](#), the task was to predict toxicity for previously seen compounds in new cell lines, while [Subchallenge 2](#) asked participants to estimate the distribution of toxicity of new compounds across cell lines.

### Winning Submissions

#### Subchallenge 1

The [winning entry for subchallenge 1](#) came from [Tao Wang](#) of the [Yang](#) lab at the [Quantitative Biomedical Research Center](#) at UTSW. [R source code](#) available.

Runners up, [Team CASSIS](#), submitted an entry titled, [Kernel Bilinear Regression for toxicogenetics](#) along with [source code in R](#).

#### Subchallenge 2

The [winning entry for subchallenge 2](#) also came from [QBRC](#), this time from a team led by [Hao Tang](#). The approach was to cluster compounds then predict based on similarity of new compounds to the clusters. [R source code](#) available.

### Participating Teams

#### Subchallenge 1

| Team     | Project                   | Team Members              | Organization(s)                                                                                                     | Location(s)    |
|----------|---------------------------|---------------------------|---------------------------------------------------------------------------------------------------------------------|----------------|
| amss2012 | <a href="#">syn376020</a> | Junfei Zhao, Shihua Zhang | National Center for Mathematics and Interdisciplinary Sciences, Academy of Mathematics and Systems Science, Chinese | Beijing, China |

| Team              | Project                                                    | Team Members                                                                                                                                                                                                | Organization(s)                                                                                                          | Location(s)                  |
|-------------------|------------------------------------------------------------|-------------------------------------------------------------------------------------------------------------------------------------------------------------------------------------------------------------|--------------------------------------------------------------------------------------------------------------------------|------------------------------|
|                   |                                                            |                                                                                                                                                                                                             | Academy of Sciences                                                                                                      |                              |
| bioinfoCIPF       | <a href="#">syn2225007</a>                                 | Alicia Amadoz, Patricia Sebastian-Leon, Rosa D. Hernansaiz and Joaquin Dopazo                                                                                                                               | Computational Genomics Department, Centro de Investigacion Principe Felipe (CIPF)                                        | Valencia, Spain              |
| BorRfLm           | <a href="#">syn2223113</a>                                 | Zofia Wiśniewska, Miron Bartosz Kursa                                                                                                                                                                       | Interdisciplinary Centre for Mathematical and Computational Modelling, University of Warsaw                              | Warsaw, Poland               |
| CASSIS            | <a href="#">syn2224192</a>                                 | Elsa Bernard <sup>1,2,3</sup> , Erwan Scornet <sup>1,2,3,4</sup> , Yunlong Jiao <sup>1,2,3</sup> , Veronique Stoven <sup>1,2,3</sup> , Thomas Walter <sup>1,2,3</sup> , Jean-Philippe Vert <sup>1,2,3</sup> | 1 Mines ParisTech, Centre for Computational Biology; 2 Institut Curie; 3 INSERM U900; 4 University Pierre et Marie Curie | Fontainebleau; Paris, France |
| Charlie's Minions | <a href="#">syn2226551</a> ;<br><a href="#">syn2226432</a> | Charlie Liu                                                                                                                                                                                                 |                                                                                                                          | Ashburn, Virginia, USA       |
| CompModel-IGIB    | <a href="#">syn1999433</a>                                 | Rintu Kutum                                                                                                                                                                                                 | CSIR-Institute of Genomics & Integrative Biology                                                                         | New Delhi, India             |
| CQB               | <a href="#">syn2226572</a>                                 | Dai Ziwei, Shao Bin                                                                                                                                                                                         | Center of Quantitative Biology, Peking University                                                                        | Beijing, China               |
| CytotoxicAvengers | <a href="#">syn2208220</a>                                 | Ravi Narasimhan                                                                                                                                                                                             |                                                                                                                          |                              |
| D-Tox             | <a href="#">syn2203318</a>                                 | Mathieu Clément-Ziza <sup>1,2</sup> , Michael Kuhn <sup>1</sup> , Eleni G. Christodoulou <sup>1</sup> , Susanne Reinhardt <sup>1</sup> , and Andreas Beyer <sup>1,2</sup>                                   | 1 BIOTEC, Technical University of Dresden; 2 CECAD, University of Cologne                                                | Dresden; Cologne, Germany    |
| FastRun           | <a href="#">syn2226802</a>                                 | Jungsoo Chang, Marianne Cowherd, Pelham Barron, and Inhan Lee                                                                                                                                               | miRcore                                                                                                                  | Ann Arbor, Michigan, USA     |
| FIN&al            | <a href="#">syn2226548</a>                                 | Muhammad Ammad-uddin                                                                                                                                                                                        | Helsinki Institute for Information Technology, Department of Information and Computer Science, Aalto                     | Espoo, Finland               |

| Team                       | Project                                                 | Team Members                                                                                                                                                                                                                    | Organization(s)                                                                                                                                                                | Location(s)                      |
|----------------------------|---------------------------------------------------------|---------------------------------------------------------------------------------------------------------------------------------------------------------------------------------------------------------------------------------|--------------------------------------------------------------------------------------------------------------------------------------------------------------------------------|----------------------------------|
|                            |                                                         |                                                                                                                                                                                                                                 | University                                                                                                                                                                     |                                  |
| ICOS Team                  | <a href="#">syn2027319</a>                              | Nicola Lazzarini, Dr. Jaume Bacardit                                                                                                                                                                                            | Newcastle University                                                                                                                                                           | Newcastle, UK                    |
| Kaiju                      | <a href="#">syn2196876</a>                              | Michael K.K. Leung                                                                                                                                                                                                              | University of Toronto                                                                                                                                                          | Toronto, Canada                  |
| mlcb                       | <a href="#">syn2227344</a>                              | Chloé-Agathe Azencott, Karsten Borgwardt, Dominik Grimm, Felipe Llinares López, Carl Johann Simon-Gabriel                                                                                                                       | Machine Learning and Computational Biology Research Group, Max Planck Institutes for Developmental Biology and for Intelligent Systems                                         | Tübingen, Germany                |
| MPIMG                      | <a href="#">syn2227595</a>                              | Matthias Heinig <sup>1,2</sup> , Matthew Huska <sup>1</sup> , Alessandro Mammana <sup>1</sup> , Alena van Bömmel <sup>1</sup> , Juliane Perner <sup>1</sup> , Brian Caffrey <sup>1</sup> and Martin Vingron <sup>1</sup>        | 1 Max Planck Institute for molecular Genetics; 2 Max-Delbrück Center for Molecular Medicine                                                                                    | Berlin, Germany                  |
| O6d0A                      | <a href="#">syn2227297</a>                              | Sean Whalen <sup>1,2</sup> , Gaurav Pandey <sup>2</sup> , Douglas Ruderfer <sup>2</sup>                                                                                                                                         | 1 Gladstone Institutes; 2 Mount Sinai                                                                                                                                          | San Francisco; New York, USA     |
| TeamRoslin                 | <a href="#">syn2223083</a> ; <a href="#">syn2226631</a> | Konrad Rawlik, Sofie Demeyer, Tom Michoel, Albert Tenesa                                                                                                                                                                        | Division of Genetics and Genomics, The Roslin Institute, University of Edinburgh                                                                                               | Scotland, UK                     |
| The fellowship of the ring | <a href="#">syn2223016</a> ; <a href="#">syn2223112</a> | S. Alaimo <sup>1</sup> , A. Pulvirenti <sup>2</sup> , M. Mongioli <sup>1</sup> , R. Giugno <sup>2</sup> , R. Sharan <sup>3</sup> , A. Ferro <sup>2</sup>                                                                        | 1 Department of Mathematics and Computer Science; 2 Department of Clinical and Molecular Biomedicine, University of Catania; 3 School of Computer Science, Tel-Aviv University | Catania, Italy; Tel-Aviv, Israel |
| UT_CCB                     | <a href="#">syn2227179</a>                              | Liang-Chin Huang <sup>1</sup> , Yonghui Wu <sup>1</sup> , Yunguo Gong <sup>1</sup> , Jeffrey Chang <sup>1,2</sup> , Trevor Cohen <sup>1</sup> , Jingchun Sun <sup>1</sup> , W. Jim Zheng <sup>1</sup> , and Hua Xu <sup>1</sup> | 1 School of Biomedical Informatics; 2 Department of Integrative Biology and Pharmacology, The University of Texas Health Science Center at Houston                             | Houston, Texas, USA              |

| Team               | Project                    | Team Members                                                                               | Organization(s)                                                                 | Location(s)        |
|--------------------|----------------------------|--------------------------------------------------------------------------------------------|---------------------------------------------------------------------------------|--------------------|
| WarwickDataScience | <a href="#">syn2211146</a> | Richard S. Savage <sup>1,2</sup> ,<br>Jonathan D. Moore <sup>1</sup>                       | 1 Systems Biology Centre; 2<br>Warwick Medical School,<br>University of Warwick | Warwick, UK        |
| Yang_Lab           | <a href="#">syn2218909</a> | Tao Wang, Hao Tang,<br>Jichen Yang, Rui Zhong,<br>Xiaowei Zhan, Yang Xie,<br>Guanghua Xiao | University of Texas<br>Southwestern Medical Center                              | Dallas, Texas, USA |

## Subchallenge 2

| Team           | Project                                                                                                                                                                | Team Members                                                                                                                                                       | Organization(s)                                                                                                                                     | Location(s)         |
|----------------|------------------------------------------------------------------------------------------------------------------------------------------------------------------------|--------------------------------------------------------------------------------------------------------------------------------------------------------------------|-----------------------------------------------------------------------------------------------------------------------------------------------------|---------------------|
| amss2012       | <a href="#">syn376020</a>                                                                                                                                              | Junfei Zhao, Shihua<br>Zhang                                                                                                                                       | National Center for Mathematics<br>and Interdisciplinary Sciences,<br>Academy of Mathematics and<br>Systems Science, Chinese<br>Academy of Sciences | Beijing, China      |
| Austria        | <a href="#">syn2208373</a><br>;<br><a href="#">syn2226984</a><br>;<br><a href="#">syn2227016</a><br>;<br><a href="#">syn2227023</a><br>;<br><a href="#">syn2227030</a> | Günter Klambauer,<br>Andreas Mayr, and<br>Sepp Hochreiter                                                                                                          | Institute of Bioinformatics,<br>Johannes Kepler University                                                                                          | Linz, Austria       |
| Battelle Team  | <a href="#">syn2223161</a>                                                                                                                                             | David A. Friedenber,<br>Courtney A. Granville,<br>Aaron J. Sander,<br>Andrea L. Peabody,<br>April M. Brys, Carol G.<br>Riffle, Joel D. Elhard,<br>Jenni W. Gorospe | Battelle                                                                                                                                            | Columbus, Ohio, USA |
| borRf          | <a href="#">syn2223113</a>                                                                                                                                             | Zofia Wiśniewska,<br>Miron Bartosz Kurska                                                                                                                          | Interdisciplinary Centre for<br>Mathematical and Computational<br>Modelling, University of Warsaw                                                   | Warsaw, Poland      |
| CompModel-IGIB | <a href="#">syn1999433</a>                                                                                                                                             | Rintu Kutum                                                                                                                                                        | CSIR-Institute of Genomics &<br>Integrative Biology                                                                                                 | New Delhi, India    |

| Team        | Project                    | Team Members                                                                                                                        | Organization(s)                                                                                                                               | Location(s)               |
|-------------|----------------------------|-------------------------------------------------------------------------------------------------------------------------------------|-----------------------------------------------------------------------------------------------------------------------------------------------|---------------------------|
| D-Tox       | <a href="#">syn2203318</a> | Michael Kuhn <sup>1</sup> , Mathieu Clément-Ziza <sup>1,2</sup> , Susanne Reinhardt <sup>1</sup> , and Andreas Beyer <sup>1,2</sup> | 1 BIOTEC, Technical University of Dresden; 2 CECAD, University of Cologne                                                                     | Dresden; Cologne, Germany |
| FIN&al      | <a href="#">syn2226779</a> | Muhammad Ammad-ud-din                                                                                                               | Helsinki Institute for Information Technology, Department of Information and Computer Science, Aalto University                               | Espoo, Finland            |
| ICOS Team   | <a href="#">syn2331289</a> | Nicola Lazzarini, Dr. Jaume Bacardit                                                                                                | Newcastle University                                                                                                                          | Newcastle, UK             |
| Kaiju       | <a href="#">syn2224382</a> | Michael K.K. Leung                                                                                                                  | University of Toronto                                                                                                                         | Toronto, Canada           |
| Lasige      | <a href="#">syn2219104</a> | Ana L. Teixeira <sup>1,2</sup> and Andre O. Falcao <sup>1</sup>                                                                     | 1 LaSIGE, Departamento de Informática, Faculdade de Ciências; 2 Centro de Química e Bioquímica, Faculdade de Ciências, Universidade de Lisboa | Lisboa, Portugal          |
| mlcb        | <a href="#">syn2226747</a> | Chloé-Agathe Azencott, Karsten Borgwardt, Dominik Grimm, Felipe Llinares López, Carl Johann Simon-Gabriel                           | Machine Learning and Computational Biology Research Group, Max Planck Institutes for Developmental Biology and for Intelligent Systems        | Tübingen, Germany         |
| Opiyo       | <a href="#">syn2226787</a> | Stephen O. Opiyo                                                                                                                    | Molecular and Molecular Imaging Center, Ohio State University                                                                                 | Columbus, Ohio, USA       |
| QBRC        | <a href="#">syn2226486</a> | Hao Tang, Jichen Yang, Tao Wang, Guanghua Xiao, Yang Xie                                                                            | QBRC (Quantitative Biomedical Research Center), UT Southwestern Medical Center                                                                | Dallas, Texas, USA        |
| Team Rocket | <a href="#">syn2180970</a> | Weng Khong Lim                                                                                                                      | National Cancer Centre Singapore                                                                                                              | Singapore                 |
